# Supplementary material
Source: PubMed Central journal article supplement (PMC1976188)
Supplement: pnas_0702305104_2.pdf [file pnas_0702305104_2.pdf]

**A**

| Gene         | Expression level |
|--------------|------------------|
| Wnt1         | -                |
| Wnt2         | -                |
| Wnt3         | +                |
| Wnt3A        | +                |
| DKK1         | +                |
| DKK2         | +                |
| Kremen1      | +                |
| Kremen2      | +                |
| EF1 $\alpha$ | ++               |
| -            | Ct > 35          |
| +            | Ct 20 - 35       |
| ++           | Ct 10 - 20       |

**B**

| Gene    | Expression level |
|---------|------------------|
| Wnt1    | -                |
| Wnt2    | -                |
| Wnt3    | -                |
| Wnt3A   | -                |
| DKK1    | -                |
| DKK2    | -                |
| Kremen1 | +                |
| Kremen2 | +                |
| 18S     | ++               |
| -       | Ct > 35          |
| +       | Ct 20 - 35       |
| ++      | Ct 10 - 20       |
