# Supplementary material
Source: PubMed Central journal article supplement (PMC1976188)

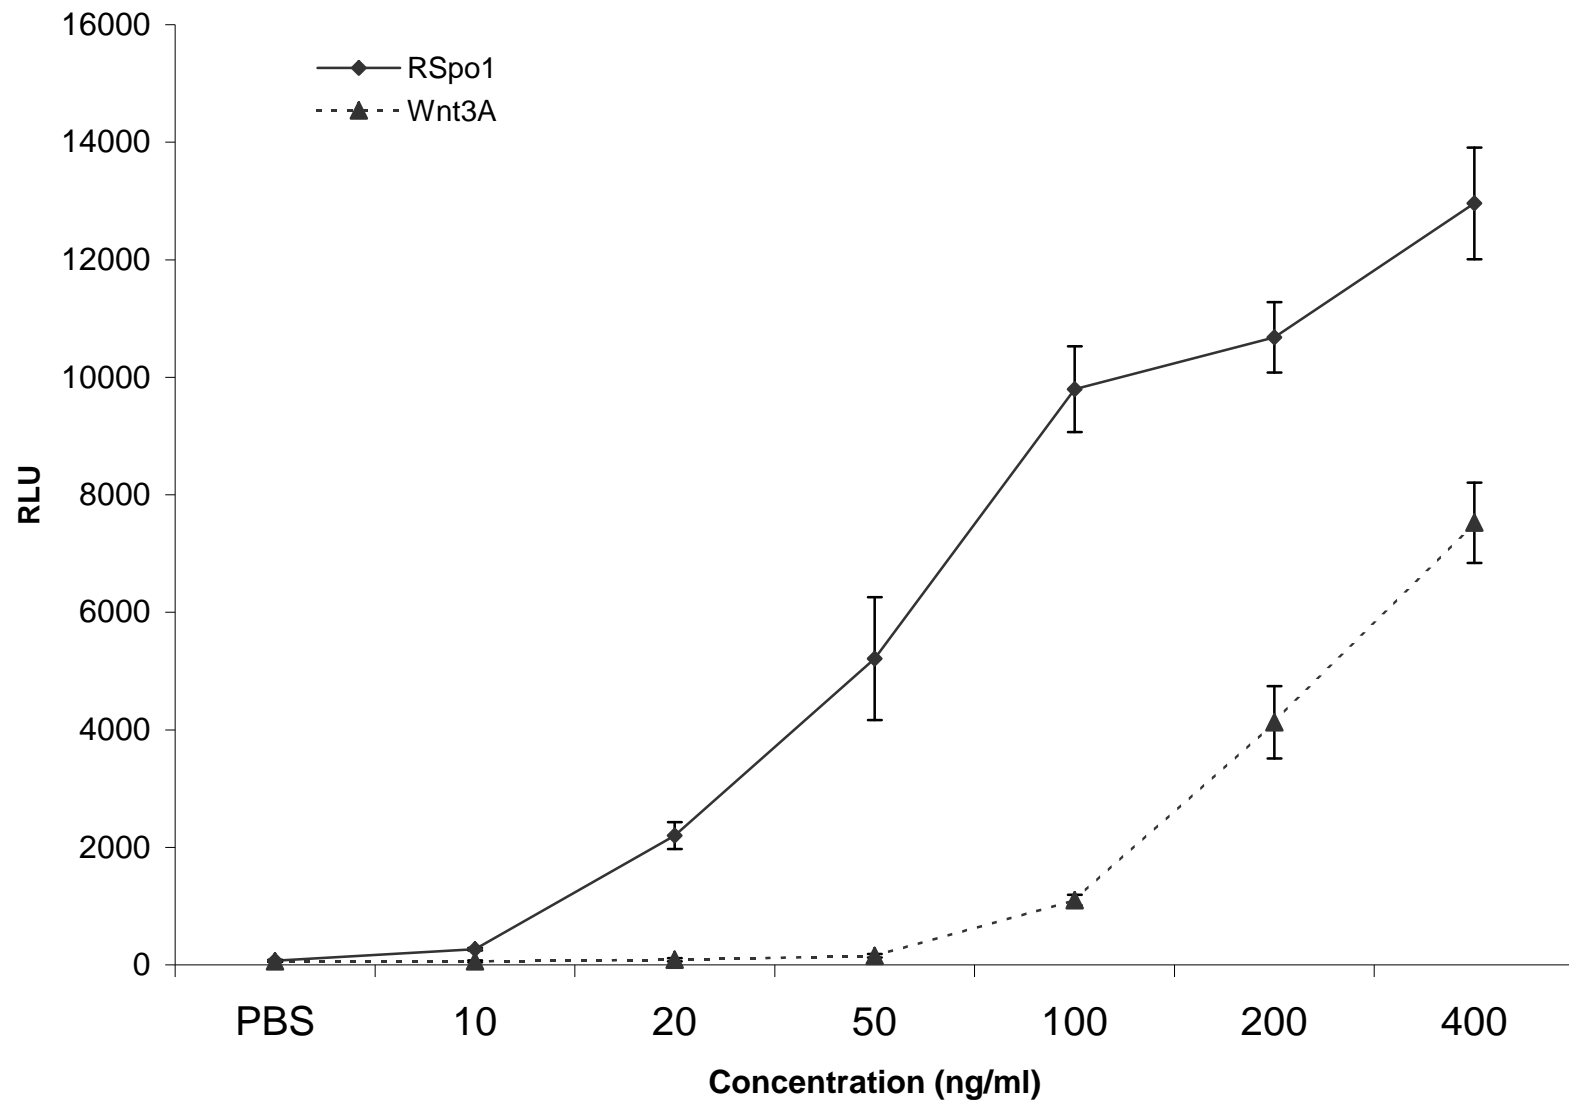

Supplement: pnas_0702305104_1.pdf [file pnas_0702305104_1.pdf]

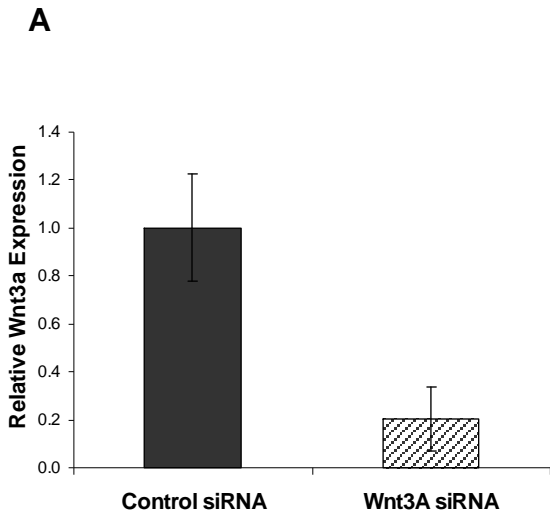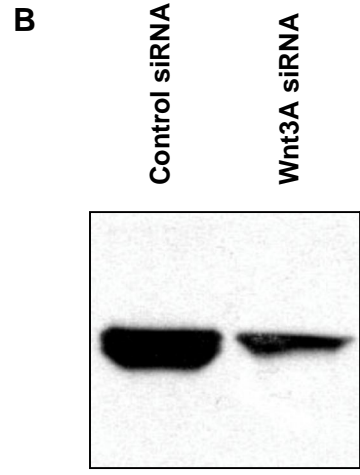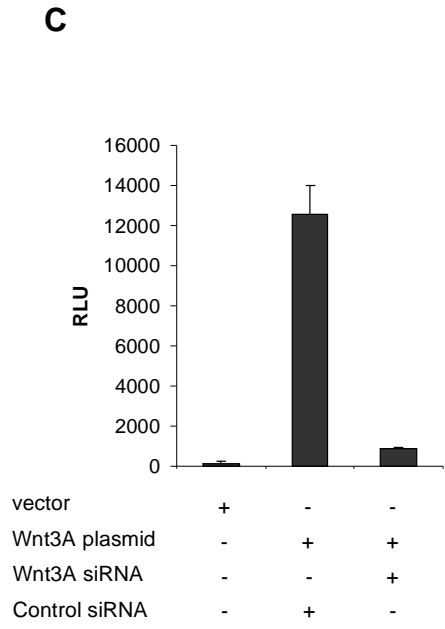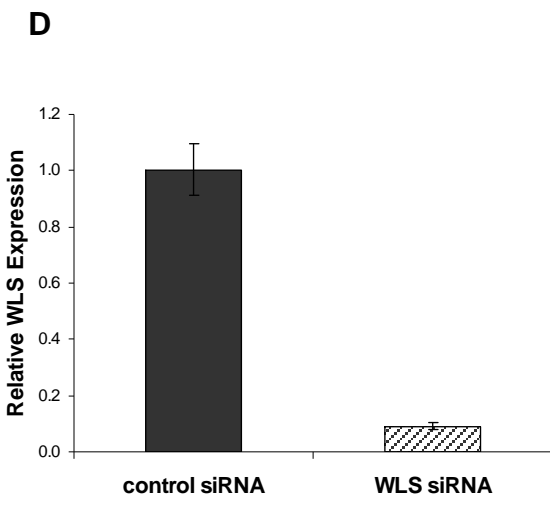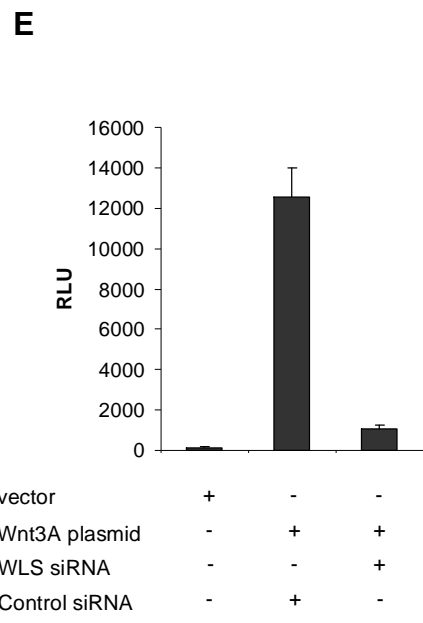

Supplement: pnas_0702305104_3.pdf [file pnas_0702305104_3.pdf]

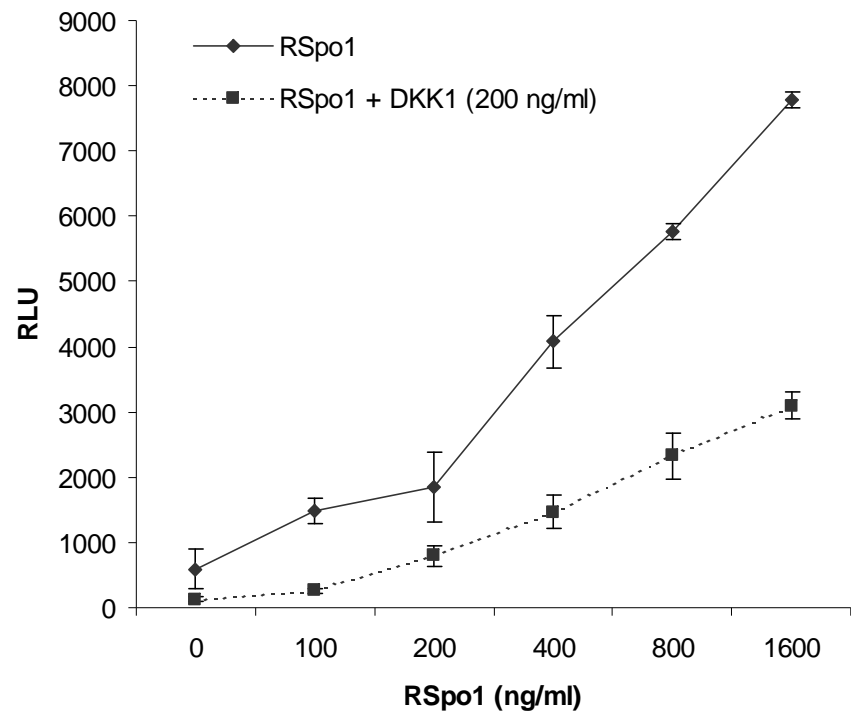

Supplement: pnas_0702305104_4.pdf [file pnas_0702305104_4.pdf]

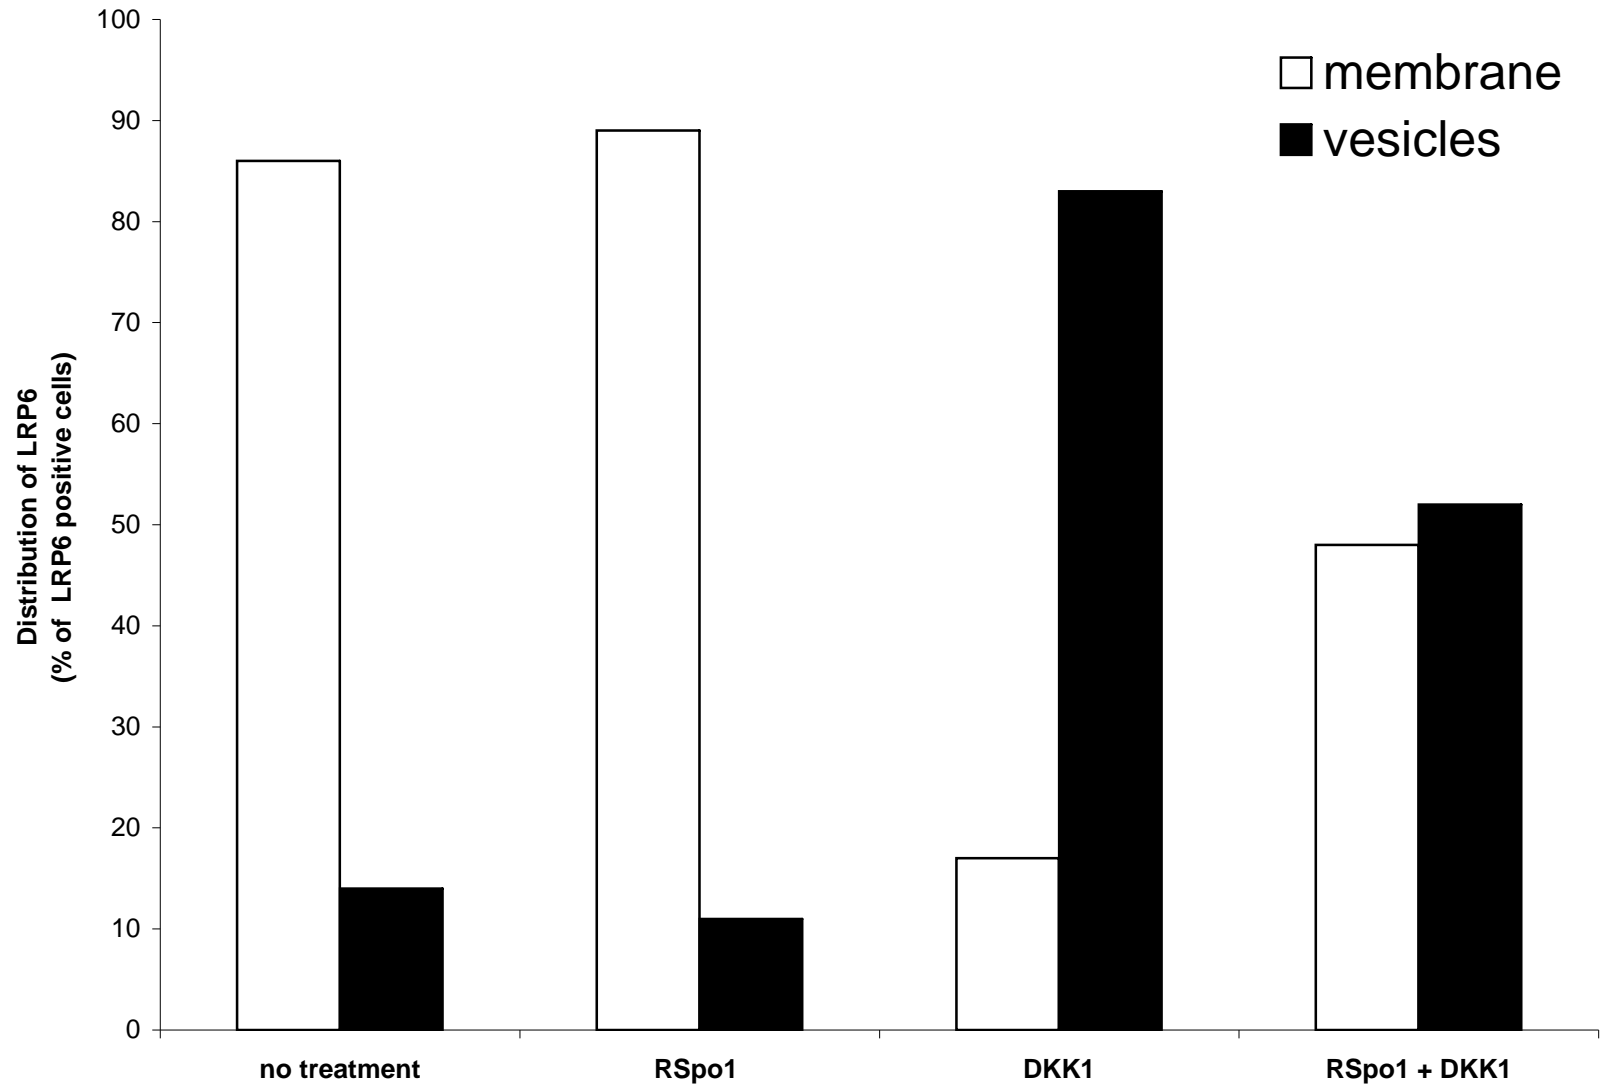

Supplement: pnas_0702305104_5.pdf [file pnas_0702305104_5.pdf]

**Control siRNA**

**Kremen2 siRNA**

Kremen2-HA

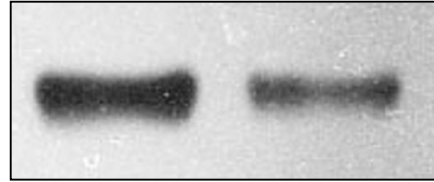

Supplement: pnas_0702305104_6.pdf [file pnas_0702305104_6.pdf]
